# Psychiatric Services

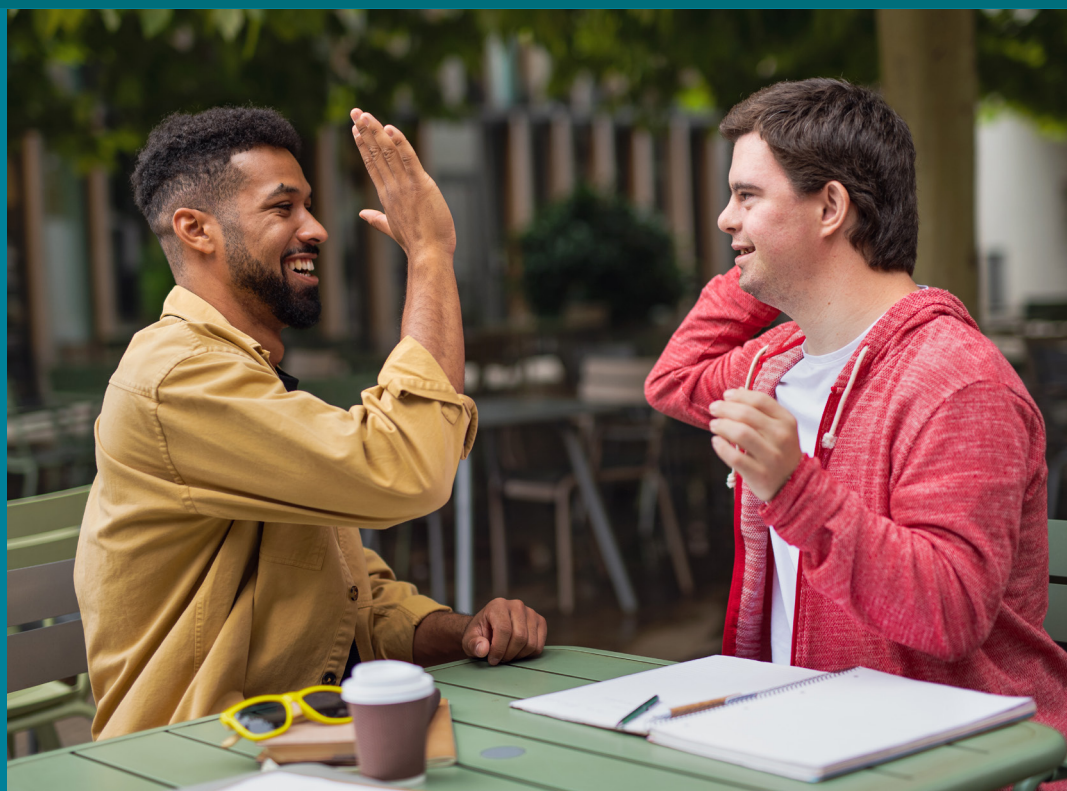

Clinical, policy, and systems considerations for persons with intellectual and developmental disabilities in the mental health system

An overview of psychosocial interventions for adults with schizophrenia

Economic evaluation of a crisis residential system

AMERICAN  
**PSYCHIATRIC**  
ASSOCIATION

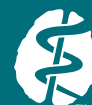

[ps.psychiatryonline.org](http://ps.psychiatryonline.org)
